# Supplementary material for: Efficacy of propolis extract and eye drop solutions to suppress encystation and excystation of Acanthamoeba triangularis WU19001-T4 genotype
Source: PeerJ journal article supplement (doi:10.7717/peerj.16937), 2024-04-11
Supplement: RawData.xlsx [file RawData.xlsx]

## Sheet: Encystment Fig 1
Propolis extract					Eye drop 3
	total cells					total cells
concentration (mg/mL)	pre-SDS	post-SDS	%encystment		concentration (%)	pre-SDS	post-SDS	%encystment
0.128 (N1)	39	15	38.4615		50 (N1)	22	0	0
0.128 (N2)	35	15	42.8571		50 (N2)	22	0	0
0.128 (N3)	41	12	29.2683		50 (N3)	22	0	0
mean			36.8623		mean			0
SD			6.20209		SD			0
0.064 (N1)	22	7	31.8182		25 (N1)	22	1	4.54545
0.064 (N2)	24	10	41.6667		25 (N2)	25	0	0
0.064 (N3)	28	10	35.7143		25 (N3)	23	0	0
mean			36.3997		mean			1.51515
SD			4.43626		SD			2.34726
0.032 (N1)	35	6	17.1429		12.5(N1)	20	0	0
0.032 (N2)	36	6	16.6667		12.5(N2)	21	0	0
0.032 (N3)	35	7	20		12.5(N3)	20	0	0
mean			17.9365		mean			0
SD			1.6125		SD			0
0.016 (N1)	36	4	11.1111		6.25(N1)	22	0	0
0.016 (N2)	37	5	13.5135		6.25(N2)	21	0	0
0.016 (N3)	31	5	16.129		6.25(N3)	20	0	0
mean			13.5846		mean			0
SD			2.24476		SD			0
untreat control (N1)	49	44	89.7959
untreat control (N2)	45	47	104.444
untreat control (N3)	51	43	84.3137
mean			92.8514
SD			9.30863
PMSF 10 mM (N1)	40	3	7.5
PMSF 10 mM (N2)	45	3	6.66667
PMSF 10 mM (N3)	39	1	2.5641
mean			5.57692
SD			2.36329
Combination (encystment)
concentration	Eye drop (%)
Propolis (mg/mL)	50			25				12.5				6.25
0.128 (N1)	40	10	25	45	11	24.4444		44	12	27.2727		44	11	25
0.128 (N2)	45	12	26.6667	44	12	27.2727		50	14	28		50	10	20
0.128 (N3)	39	11	28.2051	50	12	24		49	15	30.6122		49	9	18.3673
mean			26.6239			25.2391				28.6283				21.1224
SD			1.43376			1.58776				1.57078				3.09101
0.064 (N1)	48	15	31.25	50	14	28		51	11	21.5686		55	5	9.09091
0.064 (N2)	43	13	30.2326	55	11	20		55	10	18.1818		56	6	10.7143
0.064 (N3)	50	15	30	51	13	25.4902		48	12	25		47	7	14.8936
mean			30.4942			24.4967				21.5835				11.5663
SD			0.594617			3.65953				3.04921				2.67765
			0.594617
0.032 (N1)	50	13	26	51	12	23.5294		49	11	22.449		45	4	8.88889
0.032 (N2)	45	12	26.6667	55	12	21.8182		51	11	21.5686		49	4	8.16327
0.032 (N3)	46	12	26.087	49	14	28.5714		55	10	18.1818		46	5	10.8696
mean			26.2512			24.6397				20.7331				9.30724
SD			0.324154			3.1402				2.01508				1.25293
0.016 (N1)	55	14	25.4545	45	8	17.7778		49	11	22.449		55	2	3.63636
0.016 (N2)	50	15	30	50	10	20		52	10	19.2308		59	5	8.47458
0.016 (N3)	49	14	28.5714	51	8	15.6863		53	4	7.54717		54	4	7.40741
mean			28.0087			17.8214				16.409				6.50612
SD			2.079			1.92945				7.01358				2.27356
PMSF (10mM)	55	3	5.45455
	55	2	3.63636
	57	1	1.75439
mean			3.6151
SD			1.65484
untreat control	55	44	80
	49	43	87.7551
	50	45	90
mean			85.9184
SD			4.69299

## Sheet: Excystment Fig 2
Propolis extract					Eye drop 3
	total cells					total cells
concentration (mg/mL)	pre-SDS	post-SDS	%excystment		concentration (%)	pre-SDS	post-SDS	%excystment
0.512 (N1)	66	59	10.6061		50 (N1)	57	49	14.0351
0.512 (N2)	63	56	11.1111		50 (N2)	52	43	17.3077
0.512 (N3)	66	56	15.1515		50 (N3)	54	44	18.5185
mean			12.2896		mean			16.6204
SD			2.22834		SD			2.07452
0.256 (N1)	58	48	17.2414		25 (N1)	60	49	18.3333
0.256 (N2)	63	50	20.6349		25 (N2)	59	49	16.9492
0.256 (N3)	66	50	24.2424		25 (N3)	57	46	19.2982
mean			20.7062		mean			18.1936
SD			3.13145		SD			1.05611
0.128 (N1)	59	28	52.5424		12.5(N1)	58	35	39.6552
0.128 (N2)	52	30	42.3077		12.5(N2)	56	35	37.5
0.128 (N3)	62	29	53.2258		12.5(N3)	60	35	41.6667
mean			49.3586		mean			39.6073
SD			5.47017		SD			1.86376
0.064 (N1)	58	22	62.069		6.25(N1)	50	25	50
0.064 (N2)	59	25	57.6271		6.25(N2)	55	28	49.0909
0.064 (N3)	61	24	60.6557		6.25(N3)	56	27	51.7857
mean			60.1173		mean			50.2922
SD			2.02977		SD			1.22622
untreat control (N1)	55	7	87.2727
untreat control (N2)	56	7	87.5
untreat control (N3)	52	7	86.5385
mean			87.1037
SD			0.449497
PMSF 10 mM (N1)	55	54	1.81818
PMSF 10 mM (N2)	61	59	3.27869
PMSF 10 mM (N3)	54	53	1.85185
mean			2.31624
SD			0.745661
concentration	Eye drop (%)
Propolis (mg/mL)	50			25				12.5				6.25
0.512 (N1)	55	48	12.7273	52	43	17.3077		67	41	38.806		57	37	35.0877
0.512 (N2)	50	48	4	55	44	20		61	39	36.0656		59	45	23.7288
0.512 (N3)	52	46	11.5385	58	46	20.6897		58	40	31.0345		65	42	35.3846
mean			9.42191			19.3324				35.302				31.4004
SD			4.23331			1.59841				3.52548				5.94386
0.256 (N1)	55	31	43.6364	44	29	34.0909		55	37	32.7273		54	28	48.1481
0.256 (N2)	58	31	46.5517	49	33	32.6531		55	37	32.7273		55	33	40
0.256 (N3)	47	40	14.8936	53	30	43.3962		59	35	40.678		48	24	50
mean			35.0272			36.7134				35.3775				46.0494
SD			15.6498			5.21628				4.10572				4.75845
0.128 (N1)	46	30	34.7826	59	30	49.1525		61	25	59.0164		44	25	43.1818
0.128 (N2)	52	32	38.4615	51	31	39.2157		59	23	61.0169		54	20	62.963
0.128 (N3)	58	35	39.6552	53	23	56.6038		52	28	46.1538		58	26	55.1724
mean			37.6331			48.324				55.3957				53.7724
SD			2.2716			7.80263				7.21442				8.91262
0.064 (N1)	57	23	59.6491	61	30	50.8197		55	19	65.4545		66	32	51.5152
0.064 (N2)	43	24	44.186	66	24	63.6364		48	24	50		61	25	59.0164
0.064 (N3)	55	22	60	54	26	51.8519		61	22	63.9344		56	28	50
mean			54.6117			55.436				59.7963				53.5105
SD			8.07722			6.36875				7.61859				4.31833
0.032 (N1)	54	25	53.7037	46	20	56.5217		55	26	52.7273		51	21	58.8235
0.032 (N2)	60	21	65	48	21	56.25		59	18	69.4915		67	21	68.6567
0.032 (N3)	46	26	43.4783	50	23	54		64	22	65.625		62	19	69.3548
mean			54.0607			55.5906				62.6146				65.6117
SD			9.62878			1.23804				7.85147				5.26735
PMSF (10mM)	45	44	2.22222
	55	52	5.45455
	53	50	5.66038
mean			4.44572
SD			1.72477
untreat control	55	9	83.6364
	56	11	80.3571
	67	11	83.5821
mean			82.5252
SD			1.67954

## Sheet: Combination set and CHX Table1 
Trophozoites		viable cells
		concentration of CHX (mg/mL)
		0.001
		N1	N2	N3	X1	X2	X3	mean	SD
CHX alone		180000	160000	200000	69.2308	61.5385	76.9231	69.2308	6.88021
Combination set of encystment		80000	80000	100000	30.7692	30.7692	38.4615	33.3333	3.97229
Combination set of excystment		100000	60000	80000	38.4615	23.0769	30.7692	30.7692	6.88021
		0.002
		N1	N2	N3	X1	X2	X3	mean	SD
CHX alone		120000	140000	180000	46.1538	53.8462	69.2308	56.4103	10.5097
Combination set of encystment		40000	50000	90000	15.3846	19.2308	34.6154	23.0769	9.10166
Combination set of excystment		40000	40000	40000	15.3846	15.3846	15.3846	15.3846	0
		0.004
		N1	N2	N3	X1	X2	X3	mean	SD
CHX alone		40000	40000	80000	15.3846	15.3846	30.7692	20.5128	7.94458
Combination set of encystment		20000	20000	20000	7.69231	7.69231	7.69231	7.69231	0
Combination set of excystment		20000	20000	0	7.69231	7.69231	0	5.12821	3.97229
		0.008
		N1	N2	N3	X1	X2	X3	mean	SD
CHX alone		0	20000	20000	0	7.69231	7.69231	5.12821	3.97229
Combination set of encystment		20000	0	20000	7.69231	0	7.69231	5.12821	3.97229
Combination set of excystment		20000	0	0	7.69231	0	0	2.5641	3.97229
control (N1)		260000
control (N2)		280000
control (N3)		240000
		260000
Cysts		viable cells
		concentration of CHX (mg/mL)
		0.004
		N1	N2	N3	X1	X2	X3	mean	SD
CHX alone		240000	260000	260000	90	97.5	97.5	95	3.87298
Combination set of encystment		100000	120000	100000	37.5	45	37.5	40	3.87298
Combination set of excystment		120000	140000	200000	45	52.5	75	57.5	13.9642
		0.008
		N1	N2	N3	X1	X2	X3	mean	SD
CHX alone		180000	180000	180000	67.5	67.5	67.5	67.5	0
Combination set of encystment		60000	60000	100000	22.5	22.5	37.5	27.5	7.74597
Combination set of excystment		100000	140000	120000	37.5	52.5	45	45	6.7082
		0.016
		N1	N2	N3	X1	X2	X3	mean	SD
CHX alone		80000	100000	100000	30	37.5	37.5	35	3.87298
Combination set of encystment		20000	20000	20000	7.5	7.5	7.5	7.5	0
Combination set of excystment		20000	20000	0	7.5	7.5	0	5	3.87298
		0.032
		N1	N2	N3	X1	X2	X3	mean	SD
CHX alone		20000	20000	20000	7.5	7.5	7.5	7.5	0
Combination set of encystment		20000	0	0	7.5	0	0	2.5	3.87298
Combination set of excystment		20000	20000	0	7.5	7.5	0	5	3.87298
control (N1)		280000
control (N2)		280000
control (N3)		240000
		266667
